# Supplementary material
Source: publisher figshare collection journal article supplement (https://gsajournals.figshare.com/ndownloader/files/17787644)
Supplement: Supplementary file 1 [file 17787644]

## Supplemental Figures.

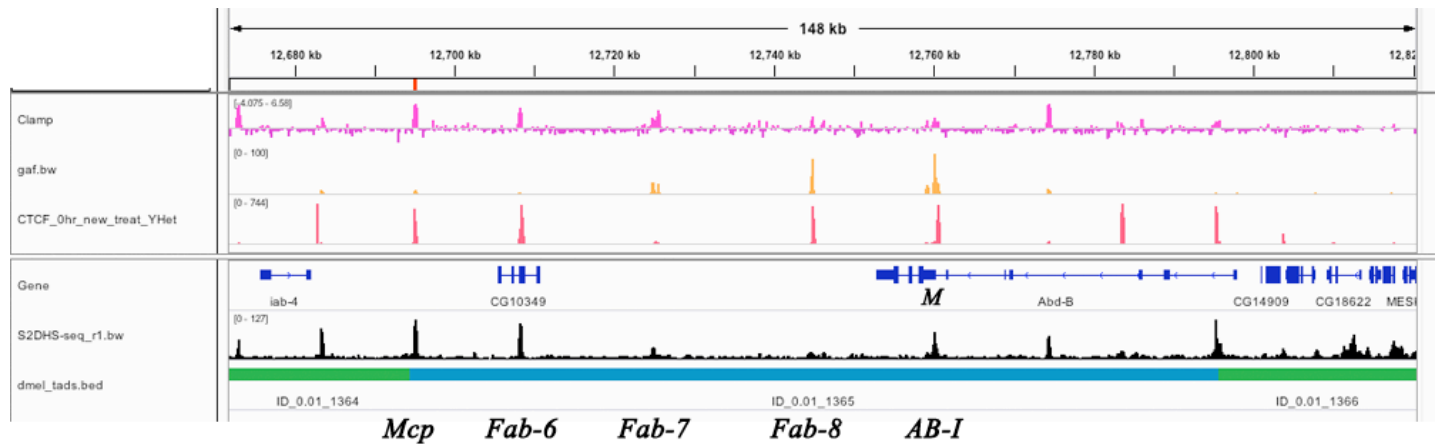

**Figure S1: Map of the *Abd-B* TAD:** Map of *Abd-B* TAD in KC tissue culture cells. Integrated Genome Viewer (IGV; James et al., 2011) screenshot of available ChIP-seq binding profiles for Clamp, GAF, dCTCF, and DNase Hypersensitive Sites (DHS-seq) across the *Abd-B* locus. The last track represents the regions identified as Topologically Associated Domains (TADs) based on Hi-C data. Green left: *abd-A* TAD; blue middle: *Abd-B* TAD; green right: neighboring TAD. The genomic coordinates are shown at the top (FlyBase R5). The data files were downloaded from Chrogenome Navigator (<http://chorogenome.ie-freiburg.mpg.de/>) (Ramírez et al., 2018). The ChIP-seq data for Clamp were downloaded from GEO Database (accession number GSE39271) (Soruco et al., 2013).

## References

Robinson J.T., H. Thorvaldsdóttir, W. Winckler, M. Guttman, E. S. Lander, *et al.*, 2011 Integrative Genomics Viewer. *Nature Biotechnology* 29, 24–26.

Ramírez, F., V. Bhardwaj, L. Arrigoni, K.C. Lam, B.A. Grüning, *et al.*, 2018 High-resolution TADs reveal DNA sequences underlying genome organization in flies. *Nature Communications*, 9(1):189.

Soruco M.M., J. Chery, E.P. Bishop, T. Siggers, M.Y. Tolstorukov *et al.*, 2013 The CLAMP protein links the MSL complex to the X chromosome during *Drosophila* dosage compensation. *Genes Dev* 27(14):1551-6.

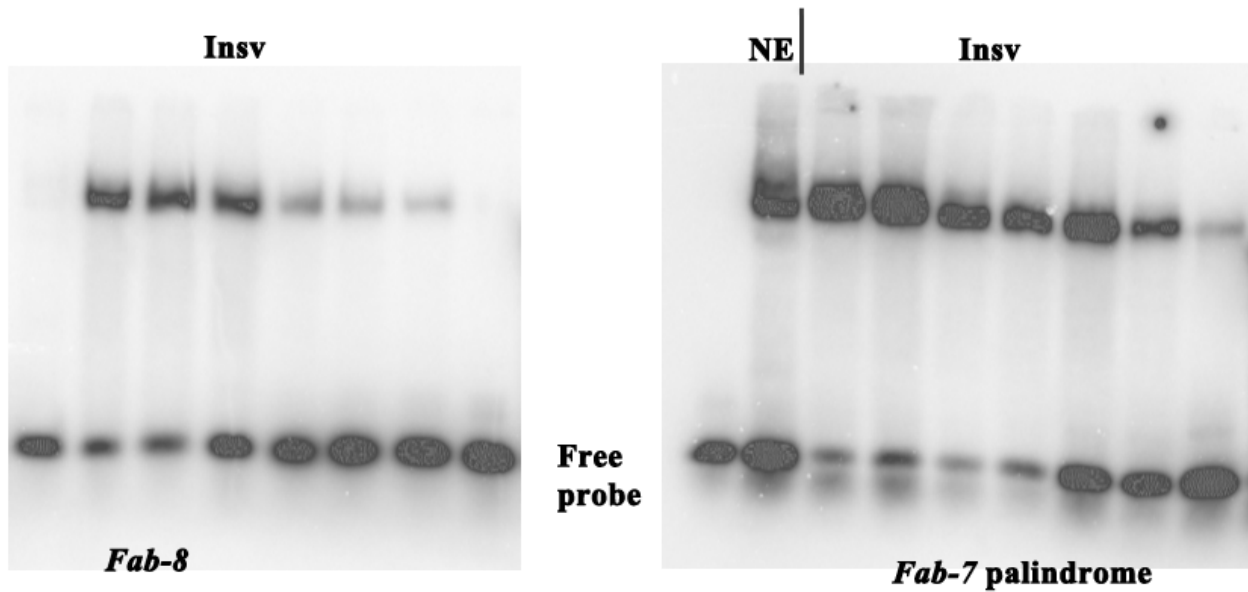

**Figure S2: Recombinant Insv binds to sequences at the proximal end of the *Fab-8* boundary.**

Increasing amounts of recombinant Insv protein was added to a reaction mix containing labeled probe from *Fab-8* that contain sequences which bind to the Elba factor. A *Fab-7* probe containing the Elba/Insv palindrome sequences is used as a positive control. Amounts of recombinant Insv protein added (left to right) to the reaction mix were estimated based on the relative intensity of the Coomassie stained protein bands in SDS-PAGE gels: 0.5  $\mu$ M, 0.25  $\mu$ M, 0.05  $\mu$ M, 0.025  $\mu$ M, 0.005  $\mu$ M, 0.0025  $\mu$ M, and 0.0005  $\mu$ M. NE: nuclear extract.

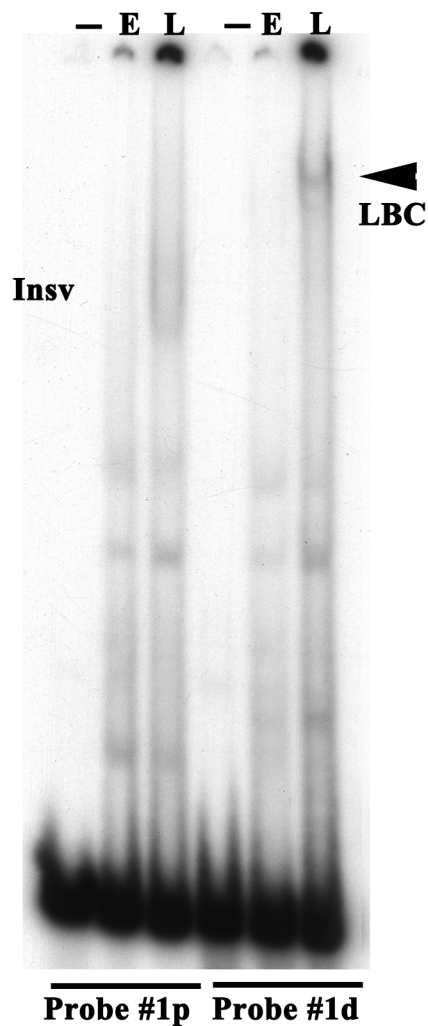

**Figure S3: The LBC binds to sequences on the distal side of probe #1.** Late nuclear extracts were used for EMSA experiments with two 70 bp overlapping probes, #1p and #1d, derived from the larger 100 bp probe #1 shown in Fig. 1. The LBC binds to probe #1d, but not to probe #1p. Probe #1p has the Elba/Insv recognition sequence shown in diagram in Fig. 1. Based on the mobility of the blurry shift in the late extract with probe #1p, it is likely to correspond to an Insv shift. Probe #1d gives the LBC like shift. -: no extract; E: early extract; L: late extract.

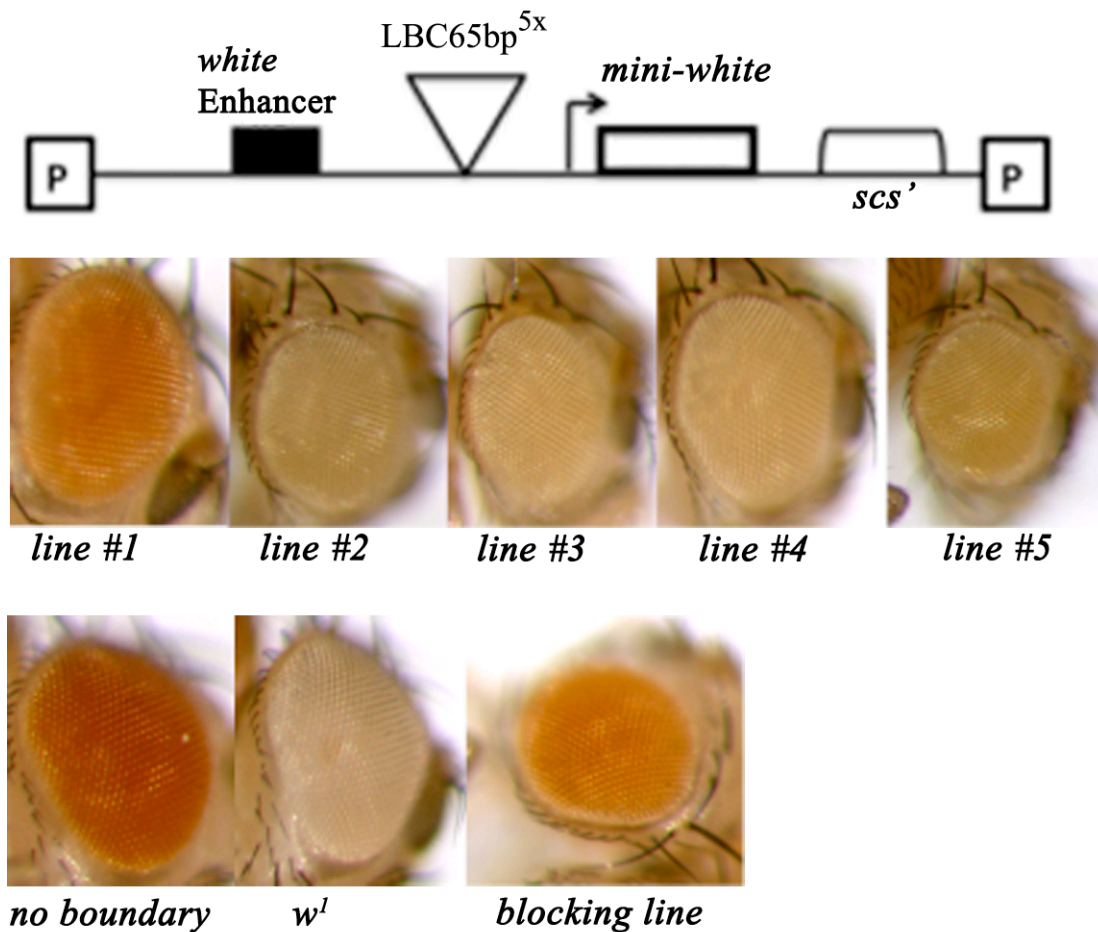

**Figure S4: A multimerized *Fab-8* 65 bp LBC recognition sequence has enhancer blocking activity.** A *mini-white* gene based enhancer blocking assay (Vazquez and Schedl, 1994; Hagstrom et al., 1996) was used to test a multimerized 65 bp LBC sequence for insulator activity. Five independent lines were recovered. In all five *white* expression (as judged by eye color) was reduced compared to a control line that lacked a boundary in the blocking position. Lines as indicated in figure.

Vazquez J, and Schedl 1994 Sequences required for enhancer blocking activity of *scs* are located within two nuclease-hypersensitive regions. EMBO J. 13(24):5984-93.

Hagstrom K, M. Muller, and Schedl. 1996 *Fab-7* functions as a chromatin domain boundary to ensure proper segment specification by the *Drosophila* bithorax complex. Genes Dev.10(24):3202-15. PMID: 8985188
